# Supplementary material for: A Novel Validated UHPLC Method for the Estimation of Rosuvastatin and Its Complete Impurity Profile in Tablet Formulations
Source: MDPI journal article supplement (doi:10.3390/molecules28010431), 2023-01-03

## Supplementary Materials

# A Novel Validated UHPLC Method for the Estimation of Rosuvastatin and Its Complete Impurity Profile in Tablet Formulations

Francesca Romana Mammone <sup>1</sup>, Leo Zanitti <sup>1</sup>, Michela Puxeddu <sup>2</sup>, Giuseppe La Regina <sup>2</sup>, Romano Silvestri <sup>2</sup>, Anna Borioni <sup>1</sup> and Roberto Cirilli <sup>1,\*</sup>

<sup>1</sup> Centre for the Control and Evaluation of Medicines, Chemical Medicines Unit, Istituto Superiore di Sanità, Viale Regina Elena 299, 00161 Rome, Italy

<sup>2</sup> Department of Drug Chemistry and Technologies, Sapienza University of Rome, P.le Aldo Moro 5, 00185 Rome, Italy

\* Correspondence: roberto.cirilli@iss.it

**Figure S1.** Typical chromatograms pertinent to placebo, RSV at LOQ value and diluent. Chromatographic conditions: column, Acquity BEH C18 (100 mm × 2.1 mm, 1.7 μm); mobile phase, MeOH-TFA 0.025% 45:55 (v/v); temperature, 55 °C; flow rate, 0.5 mL/min; detection, UV at 240 nm.

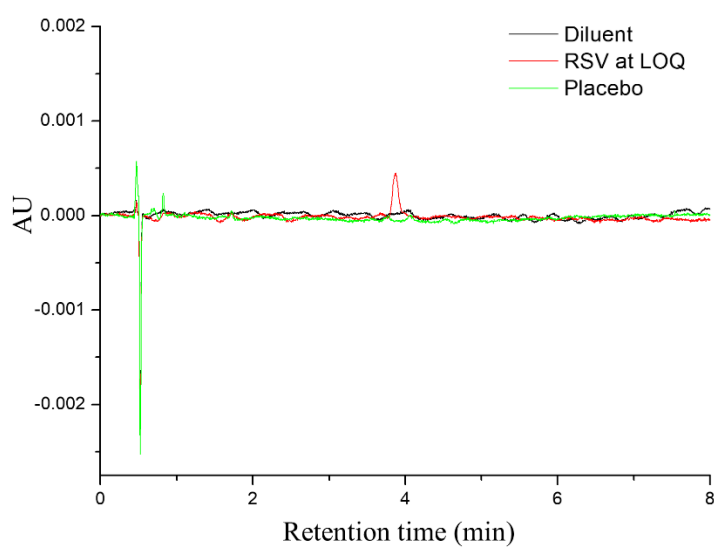

Supplement: s1 [file s1]
